# Supplementary material for: Effect of dietary phosphorus intake and age on intestinal phosphorus absorption efficiency and phosphorus balance in male rats
Source: PLoS One. 2018 Nov 19;13(11):e0207601. doi: 10.1371/journal.pone.0207601 (PMC6242370; doi:10.1371/journal.pone.0207601)
Supplement: S2 File — (XLSX) [file pone.0207601.s002.xlsx]

## Sheet: Sheet1
Rat ID	Age	P level	Final bodyweight (g)	Absorption efficiency (loops, fractional %)	Absorption from plasma (AUC)	P Balance (mg/d)	Net P Absorption (mg/d)	Ca Balance (mg/d)	Net Ca Absorption (mg/d)	Creatinine (mg/dL)	Plasma P (mg/dL)	Plasma Ca (mg/dL)	Hematocrit (%)	Urine creatinine (mg/dL)	Creatinine clearance (mL/min)	iPTH (pg/mL)	iFGF23 (pg/mL)	cFGF23 (pg/mL)	1,25D (pg/mL)	BUN (mg/dL)	NaPi-2b/Rplp0 RQ (jejunum)	NaPi-2b/Rplp0 RQ (duodenum)	PiT-1/Rplp0 RQ (jejunum)	PiT-1/Rplp0 RQ (duodenum)
1-01-L	10	Low	322.9	0.367581	0.00657894	20.4827	20.6449	45.7111	61.4735	0.6	7.9	11.3	39.5	6.71	2.42	46.697	65.569	309.857	498.161	25.2889	3.82988	7.06866	1.15875	2.14609
1-02-L	10	Low	348.3	0.394477	0.00830445	17.5024	17.6379	39.5934	48.6063	0.6	8.6	11.65	44	8.32	2.77	47.574	61.53	296.27	425.673	19.3599	7.4955	1.72373	2.18016	0.882645
1-03-M	10	Normal	360.3	0.45388	0.00874593	31.173	86.9447	38.0274	38.4157	0.4	8.75	9.7	43	10.29	4.96	735.363	205.359	419.059	399.859	17.8526	1.68867	0.0752608	1.58584	0.336715
1-04-M	10	Normal	344.3	0.369984	0.00712531	30.0168	76.1733	29.8702	30.2336	0.5	8.4	9.55	42	9.03	3.69	756.475	266.834	517.391	387.591	24.1716	1.82797	0.213386	1.8325	1.55816
1-05-H	10	High	353.8	0.497459	0.01355	66.8145	196.098	36.0271	36.7716	0.6	11.75	9.7	45.25	7.1	3.5	913.341	430.188	743.879	390.53	21.9224	3.8137	0.488772	4.60326	1.27644
1-06-H	10	High	328.8	0.350233	0.00646692	65.8824	171.874	34.3773	34.7864	0.4	8	9.4	45.5	7.32	3.93	564.357	298.072	477.531	518.927	22.26	1.47151	0.961982	1.56899	4.68612
1-37-L	10	Low	249.8	0.468531	0.0217179	10.0271	10.1222	27.0846	33.3893	0.4	9.8	9.6	.	5.58	4	168.968	60.889	285.553	427.57	21.8883	0.819722	1.25545	0.92746	6.16937
1-38-L	10	Low	270.6	0.388524	0.0117096	12.0477	12.1339	26.8524	33.7629	0.4	9.3	9.7	46	5.08	3.32	263.356	75.524	416.571	605.683	25.8513	1.60341	0.237872	1.6229	2.24993
1-39-M	10	Normal	299.2	0.479934	0.015394	31.4784	66.7721	26.4629	26.6791	0.45	9	9.15	.	7.15	3.76	590.461	338.155	505.438	393.294	19.7111	4.22033	0.685971	5.55649	5.02459
1-40-M	10	Normal	294.8	0.378296	0.0122216	28.6072	60.1582	23.9223	24.0258	0.4	9.85	9.6	42.5	6.46	3.85	565.109	314.761	506.023	494.667	20.2116	1.78023	1.15951	2.55753	5.05981
1-41-H	10	High	289.7	0.324182	0.00755763	49.8291	144.358	26.6546	27.0011	0.55	9.65	9.15	.	7.19	3.15	1075.06	280.014	517.488	337.901	22.5749	3.00609	0.526158	4.09383	2.57426
1-42-H	10	High	288.1	0.375851	0.0140992	70.5597	166.736	28.5501	28.8218	0.7	9.7	9.55	42.25	6.69	2.36	964.258	449.614	767.085	269.431	19.8173	1.75692	0.102577	2.6567	0.920095
1-43-L	10	Low	300.2	0.37426	0.0116958	16.3135	16.6402	39.8871	49.9282	0.6	10.05	12.2	39.5	7.84	3.02	51.901	65.647	384.378	601.33	22.5255	2.37478	2.7719	0.761167	1.75171
1-44-L	10	Low	273.7	0.43514	0.0157808	12.8503	12.8759	38.7167	43.0086	0.4	7.15	10.4	43	5.11	3.24	28.568	40.055	129.058	536.563	24.284	2.34646	7.6981	0.797239	4.67347
1-45-M	10	Normal	328.9	0.457328	0.0124203	3.78876	80.1421	43.888	44.4674	0.5	9.6	9.85	42	8.93	3.79	585.816	335.264	575.931	332.138	23.4801	2.24465	1.40052	2.17454	2.98222
1-46-M	10	Normal	315.5	0.494585	0.0131301	50.4379	71.2498	36.447	36.6999	0.5	8.1	9	45.5	7.95	3.57	499.871	382.07	564.808	327.137	23.4801	1.56982	0.407199	1.95339	1.61513
1-47-H	10	High	290	0.378364	0.0131719	9.70137	151.582	32.7903	33.1104	0.5	12	9.65	44.5	7.85	3.81	690.917	375.069	605.776	499.275	20.4653	1.40486	2.65578	1.3154	9.76731
1-48-H	10	High	321.8	.	0.0170506	105.046	186.295	47.8848	48.1695	0.4	8.75	9	42.5	7.18	3.89	632.997	288.801	456.919	382.443	24.9681	4.32387	1	3.53764	1
1-55-L	10	Low	271.3	0.626238	0.0192343	11.6809	11.8145	29.5543	35.7659	0.5	11.75	10.75	41.25	6.3	3.3	54.429	52.501	224.227	599.16	25.905	4.65453	5.28822	2.868	5.96455
1-56-L	10	Low	285.1	0.453627	0.0158729	12.6548	12.7369	19.8648	33.5019	.	.	.	.	7.56	.	75.589	.	.	.	.	2.32898	1.37797	1.92391	2.77383
1-57-M	10	Normal	305.3	0.529365	0.0148987	34.4306	75.0108	35.9059	36.0786	.	.	.	41	6.03	.	435.758	277.475	504.584	.	22.4138	1.32651	0.430856	1.70941	2.09034
1-58-M	10	Normal	314.5	0.360482	0.0110287	38.2295	64.3033	14.5537	14.8193	0.4	8.95	9	45.5	7.81	4.39	767.593	287.408	438.518	493.355	22.8972	1.35455	0.359232	2.33162	5.97782
1-59-H	10	High	309.3	0.324948	0.0103546	70.4838	178.119	37.6458	38.0264	0.5	9.45	9.15	45.75	6.61	2.99	651.428	272.083	400.203	457.312	25.3142	2.46709	3.0878	2.83629	9.41022
1-60-H	10	High	294.7	0.499123	0.0132526	73.0845	155.882	18.8112	19.3594	0.4	9.9	9.1	44.5	7.31	4.39	736.067	312.536	466.213	434.863	22.5212	1.33005	0.260918	2.43372	3.45012
2-07-L	20	Low	402.5	0.453014	0.0111886	6.56645	7.16104	22.7483	27.4769	.	.	.	42	12.17	.	400.608	.	241.784	.	21.6209	0.401529	0.198637	1.08222	3.00582
2-08-L	20	Low	428.8	0.337584	0.00796786	7.26036	7.528	19.0318	22.8371	0.45	7.85	10.05	42.5	16.5	5.87	176.404	163.476	277.844	376.329	20.0505	2.81803	0.196984	6.0568	2.62012
2-09-M	20	Normal	399.6	0.219853	0.00650219	1.69846	47.315	4.68828	4.96517	0.4	8.55	8.75	42.5	10.12	4.45	600.803	296.903	370.199	259.911	23.5954	1.09459	0.180379	2.69203	2.70958
2-10-M	20	Normal	419.6	0.258713	0.00639546	24.9361	51.8551	12.6556	12.9401	0.4	8.9	9.7	44	9.28	3.95	291.773	298.158	393.885	309.692	19.9968	0.659518	0.155554	2.57298	3.45039
2-11-H	20	High	400.6	0.328314	0.00792156	22.0233	164.944	23.4783	24.1386	0.5	6.65	9.1	.	9.2	3.19	228.552	339.381	360.954	324.412	19.0837	1.93794	0.195902	3.84457	3.04824
2-12-H	20	High	426.5	0.266293	0.00719503	85.0252	161.502	18.6016	18.9901	0.3	8.85	8.95	37.25	10.71	5.89	700.352	417.691	653.239	422.332	23.0034	0.76678	0.102536	2.01065	1.2249
2-13-L	20	Low	440.6	0.359245	0.00755124	9.12623	9.24064	26.5281	31.1502	0.5	6.9	10.05	42.5	10.69	3.34	139.978	117.888	214.226	296.838	25.8513	1.82573	0.393623	3.40037	3.37931
2-14-L	20	Low	422.8	0.269695	0.00632799	7.49705	7.79851	23.4302	25.4316	0.5	7.25	9.25	44.5	11.53	3.81	199.937	188.667	214.104	360.462	21.0173	1.35686	0.130435	2.21097	2.58914
2-15-M	20	Normal	445.6	0.275363	0.00570324	-9.3957	64.6917	22.9803	23.4445	0.5	8.35	9.3	44.5	12.9	4.04	382.424	380.719	447.82	333.786	19.8894	0.859235	0.17813	1.54773	4.88976
2-16-M	20	Normal	429.3	0.35639	0.00898811	26.361	63.3228	21.0768	22.2087	0.4	6.75	9.7	47.75	12.14	4.94	440.186	323.044	465.646	187.839	20.6669	0.788567	0.114188	3.54012	1.35947
2-17-H	20	High	420.8	0.402307	0.00821758	72.6835	169.066	27.3527	28.0351	0.4	7.15	9.7	45.5	12.64	5.28	422.169	282.164	387.417	401.362	18.6564	1.43116	0.718822	3.68936	10.3928
2-18-H	20	High	446.7	0.344986	0.00719942	-69.3169	163.312	13.6308	14.6142	0.4	7.2	9.9	44.5	13.91	5.47	302.946	265.351	452.723	418.397	19.6208	0.796808	0.437867	1.80258	15.4613
2-19-L	20	Low	459.4	0.425986	0.00895756	6.93352	7.15274	22.0601	25.6694	.	.	.	.	14.59	.	10.469	.	.	.	.	0.877977	0.135547	1.53036	2.54363
2-20-L	20	Low	467.9	0.290574	0.0058472	4.16061	4.41367	12.7206	15.1582	0.4	6.45	9.85	48.75	10.77	5.99	220.701	125.191	212.03	399.884	23.7999	1.34233	0.216684	3.48449	3.16163
2-21-M	20	Normal	440.8	0.320175	0.00678008	21.321	59.59	16.3006	16.6091	0.5	8.2	9.3	.	12.07	3.84	600.756	275.294	389.329	318.589	24.5352	1.6776	0.236093	3.12662	3.5389
2-22-M	20	Normal	477.7	0.350724	0.00907068	-4.97615	40.3047	-10.9702	-10.8259	0.5	7.85	8.1	46	8.78	3.09	389.147	292.994	417.498	456.365	19.7819	1.3734	0.225891	2.70191	1.79564
2-23-H	20	High	483.7	0.369755	0.00613685	48.4582	177.769	22.2026	22.6127	0.4	6.6	8.1	.	14.01	5.04	386.134	381.257	425.3	336.937	19.2594	1.1463	0.0964707	2.44535	4.56
2-24-H	20	High	459.9	0.371347	0.00767954	-19.5437	130.503	-36.5739	-35.594	0.4	8.5	9.9	43.5	14.72	5.63	356.419	355.3	498.803	340.559	19.0208	1.14317	0.28223	4.31753	1.70834
2-25-L	20	Low	430.5	0.508893	0.0100534	10.2606	10.4369	24.7379	31.7376	0.5	8.1	9.5	44.5	10.45	3.38	201.15	199.092	307.047	487.396	20.5658	1.80599	0.122337	2.73486	1.17048
2-26-L	20	Low	447.5	0.448561	0.00469009	10.7665	11.1403	26.6012	30.5107	0.45	5.9	8.95	47.5	12.51	4.32	207.939	114.788	218.847	390.493	20.6663	1.32247	0.297478	3.04561	3.41811
2-27-M	20	Normal	444.6	0.39706	0.00631271	24.1441	68.5846	8.56953	8.83064	0.5	7.75	9.05	45.75	7.42	2.43	514.885	555.949	699.825	278.486	22.7264	1.41055	.	5.67857	.
2-28-M	20	Normal	448.8	0.377625	0.00736502	15.2835	68.6029	18.6084	19.3815	0.4	7.95	9.2	46.25	12.98	5.06	353.308	296.717	483.931	167.054	17.1623	1.36566	0.166896	4.2296	1.816
2-29-H	20	High	436.9	0.451192	0.00640072	37.0746	158.404	13.8371	14.83	0.45	6.35	9.35	46.5	11.3	4.1	234.349	433.754	664.085	290.357	14.3855	1.1589	0.161282	2.88931	3.01144
2-30-H	20	High	448.4	0.357483	0.00708819	37.7362	177.979	23.7186	24.2789	0.4	7.7	9.35	47.5	13.19	5.18	381.527	371.529	538.14	319.354	14.3855	1.4514	0.228932	3.33269	3.35133
3-31-L	30	Low	448	0.414935	0.00906134	5.84623	6.13339	15.2072	18.9151	0.45	8.4	8.85	45	13.38	4.7	506.883	207.116	351.078	312.903	16.1441	1.25184	0.169901	7.19972	9.14807
3-32-L	30	Low	493	0.457961	0.00917438	10.1279	10.3515	22.0332	29.6827	0.5	7.85	8.95	42.5	9.98	2.98	384.101	119.403	264.052	500.595	18.4052	2.56637	0.513077	4.10116	6.47295
3-33-M	30	Normal	506	0.38309	0.00571288	14.6955	65.0326	17.2257	17.9171	0.5	7.6	9.5	41	14.03	3.87	582.888	481.216	644.602	227.776	18.1712	1.6961	0.074365	12.7884	4.20402
3-34-M	30	Normal	501.4	0.475921	0.00873849	20.351	66.4905	20.2079	20.9849	0.4	7.75	9.15	43.75	14.7	5.18	410.829	314.338	564.762	255.197	19.3599	2.38285	0.18319	.	4.44923
3-35-H	30	High	445.3	0.410778	0.00535822	88.1125	188.922	24.6975	25.3216	0.4	6.1	9.2	42.5	9.71	3.82	502.005	328.255	451.942	220.516	17.5871	1.48719	0.449519	4.71479	6.05917
3-36-H	30	High	444.3	0.392908	0.00807767	55.4918	140.1	12.9196	13.5151	0.4	7.15	9.5	45.5	10.21	4.45	515.967	437.147	488.582	217.707	16.1833	1.02527	0.18607	6.78716	5.10542
3-49-L	30	Low	453.3	0.351538	0.00763331	5.61198	5.82775	11.6643	15.6074	0.45	6.95	9.6	.	14.08	4.87	324.185	95.75	202.712	272.454	19.2332	3.11062	0.379083	7.01748	6.68026
3-50-L	30	Low	509.2	0.242759	0.00416032	-10.8217	-10.6779	-70.6686	-68.0622	0.45	5.45	10.05	44.25	10.54	3.35	114.775	134.926	198.052	333.574	17.3747	3.69463	0.3693	5.62316	2.03569
3-51-M	30	Normal	460.8	.	0.00915887	18.2173	59.0491	11.6239	12.3237	0.55	6.45	9.65	.	14.01	3.92	1021.6	296.76	583.62	268.57	20.319	2.68958	0.144048	6.06088	1.31688
3-52-M	30	Normal	470.3	0.333544	0.00688278	-11.187	24.617	-34.1575	-33.6328	0.5	6.9	9.85	41.25	11.85	3.54	264.266	315.335	484.622	331.9	18.8084	2.05927	0.0774392	5.93634	1.31778
3-53-H	30	High	466.2	0.337827	0.00657732	42.7639	145.73	7.14818	7.56923	0.4	8.1	9.7	.	13.35	5.1	524.767	307.487	511.731	433.94	17.6872	5.27746	0.0743667	7.26271	0.397393
3-54-H	30	High	466.1	0.286329	0.00627803	6.34128	121.366	-19.7509	-19.1227	0.4	6.95	9.9	43.25	14.59	5.58	167.367	336.7	441.99	464.602	13.7662	3.30952	0.888961	8.43246	4.39958
3-61-L	30	Low	506.2	0.318548	0.0073129	9.49251	9.69401	22.9045	28.3968	0.5	7.5	9.45	44.25	14.07	4	388.149	146.359	257.835	219.453	22.3662	0.663387	0.376929	2.19488	6.54901
3-62-L	30	Low	509.5	0.476825	0.011333	12.615	12.9362	30.1347	37.3484	0.4	7.45	9.7	46	14.68	5.2	302.054	115.705	344.238	.	17.0485	1.8831	0.402672	2.62684	3.37445
3-63-M	30	Normal	526.2	0.404485	0.00807415	0.807087	61.4091	19.696	20.5121	0.5	7.75	9.3	45	14.28	3.83	486.684	304.217	526.58	298.877	11.9737	0.460687	0.0855995	3.23614	3.57407
3-64-M	30	Normal	524.6	0.317244	0.00544887	16.8038	57.6262	17.5358	17.9987	0.4	6.55	10.05	48	14.96	5.05	203.397	397.779	523.074	363.27	18.1169	0.301712	0.0842732	2.23323	2.62761
3-65-H	30	High	490.1	0.326795	.	63.3226	169.624	25.8448	26.5069	0.4	7.15	10.05	46.75	12.74	4.54	477.675	342.999	549.24	352.102	14.3352	0.285917	0.111845	1.38237	2.69727
3-66-H	30	High	475.2	0.391424	0.00613574	-25.6383	144.508	16.0765	16.7633	0.4	7.9	9.5	46.75	14.65	5.38	519.487	282.239	467.603	372.9	23.0046	0.49037	0.10392	1.90797	2.33072
3-67-L	30	Low	484.9	0.256371	0.00550842	8.94881	9.24554	21.9267	27.8907	0.45	7.6	10.05	.	15.6	5	17.06	46.269	.	309.173	19.127	1.22126	0.304612	3.50391	4.07864
3-68-L	30	Low	537	0.248651	0.0047549	3.18226	3.36416	-0.533621	7.74802	0.45	6.15	10.5	44	14.14	4.22	65.573	127.873	248.531	429.033	19.9235	0.642354	0.163635	1.60485	1.32438
3-69-M	30	Normal	526.5	0.24025	0.00478034	-13.3075	52.8545	-3.43109	-2.85658	0.5	7.5	10.1	46.5	15.91	4.3	236.028	283.973	480.269	391.369	18.9677	0.429	0.208048	1.37603	2.23708
3-70-M	30	Normal	468.9	0.302382	0.00688707	27.2724	55.2605	8.87937	9.37282	0.5	6.85	9.7	42	14.33	4.25	291.796	329.809	416.411	282.765	18.0032	0.476386	0.701981	0.977326	8.86507
3-71-H	30	High	482.8	0.291036	0.00618957	25.0725	152.82	-6.2697	-5.38074	0.4	7.15	10.1	47.5	13.36	4.87	244.57	368.566	501.486	.	22.5786	0.87577	0.19559	4.74446	3.63253
3-72-H	30	High	463.7	0.330056	0.00699445	60.3826	176.156	16.6898	17.5043	0.4	7.3	10.05	46.25	13.89	5.27	420.827	378.779	526.124	305.443	21.071	0.441321	0.178635	1.27176	2.43614
